# Supplementary material for: Ganglioside GM3 prevents high fat diet-induced hepatosteatosis via attenuated insulin signaling pathway
Source: PubMed Central journal article supplement (PMC9956598; doi:10.1371/journal.pone.0281414), 2023-02-24

Figure 4B:  
FAT/CD36

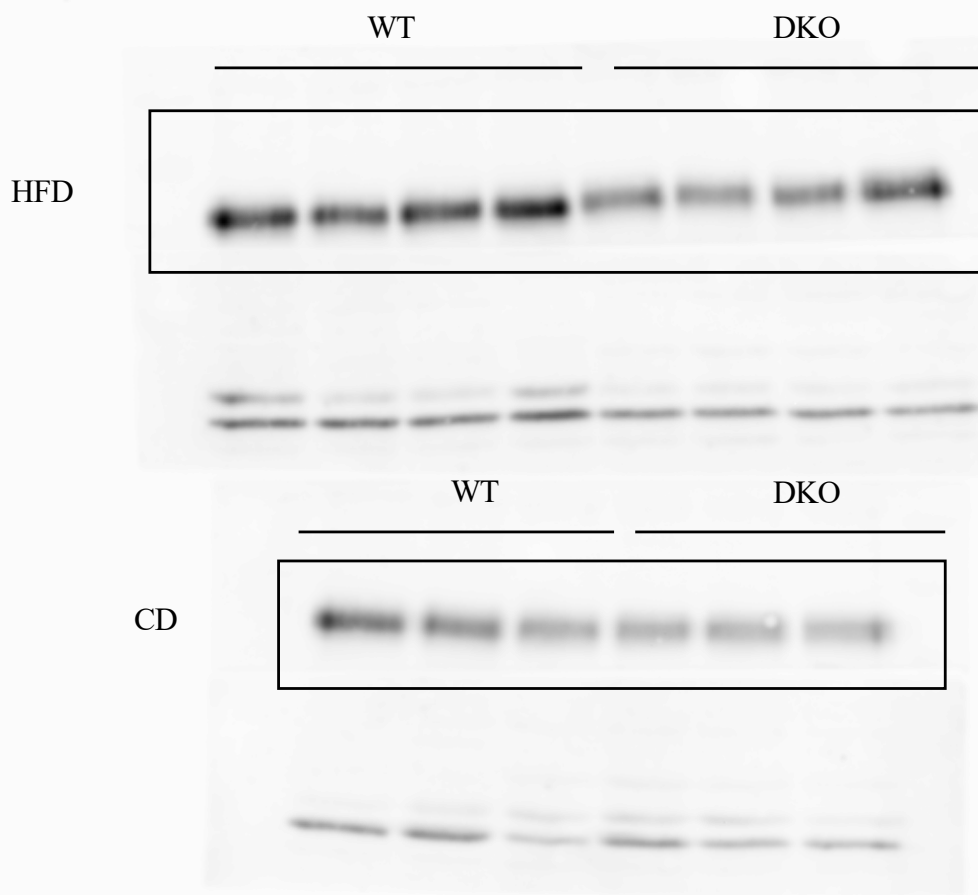

Figure 4B:  
FABP1

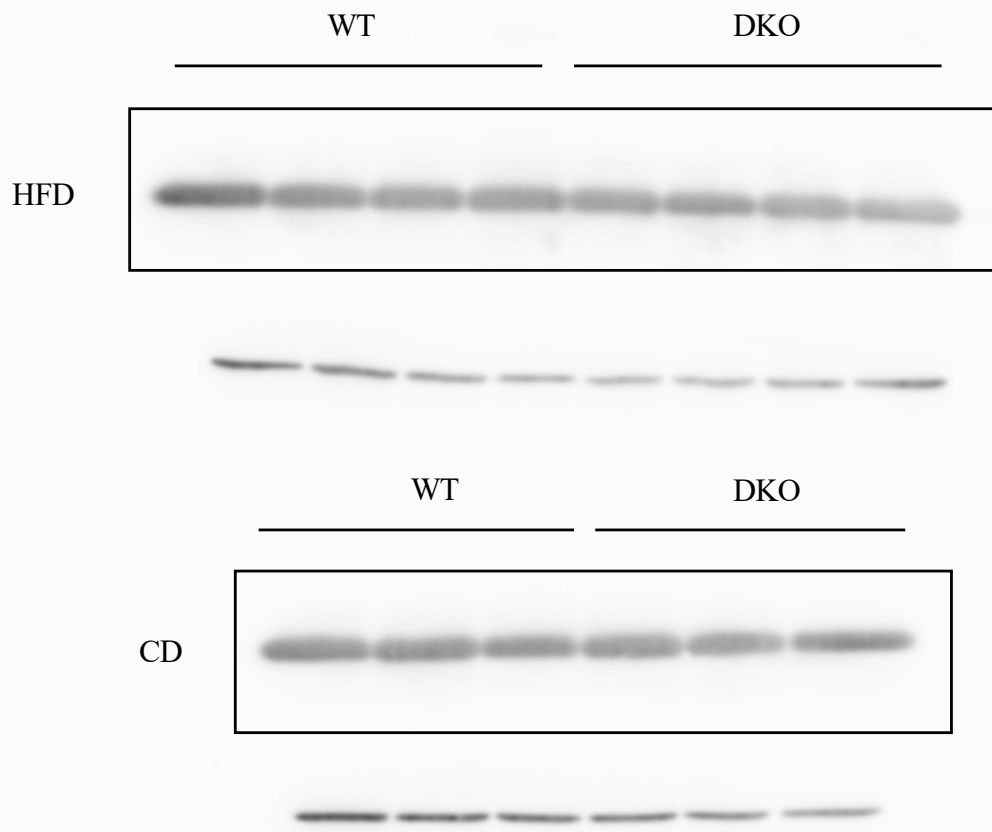

Figure 4B:  
FASN

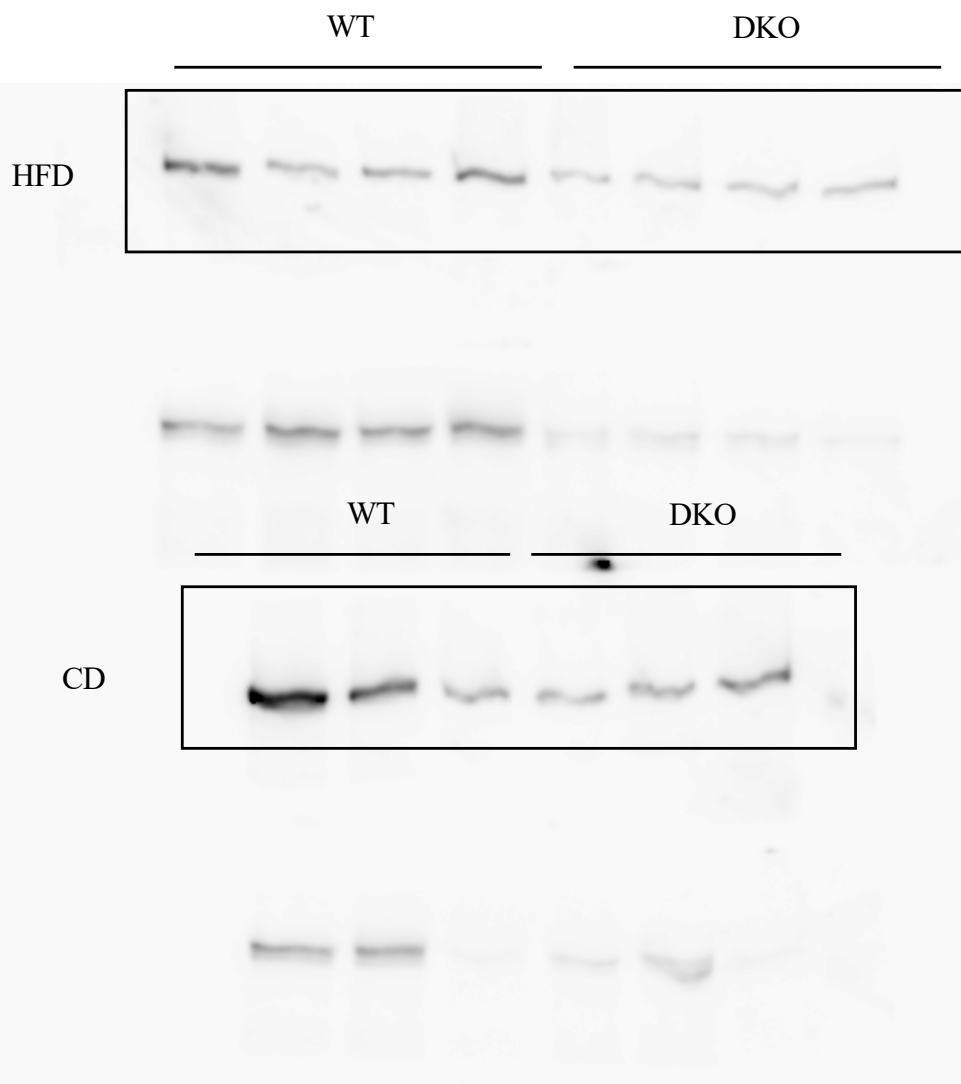

Figure 4B:  
ACC

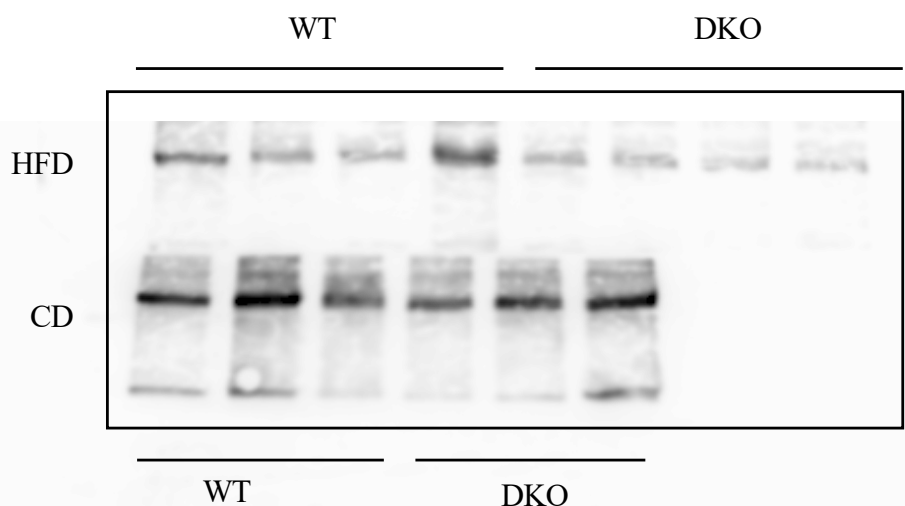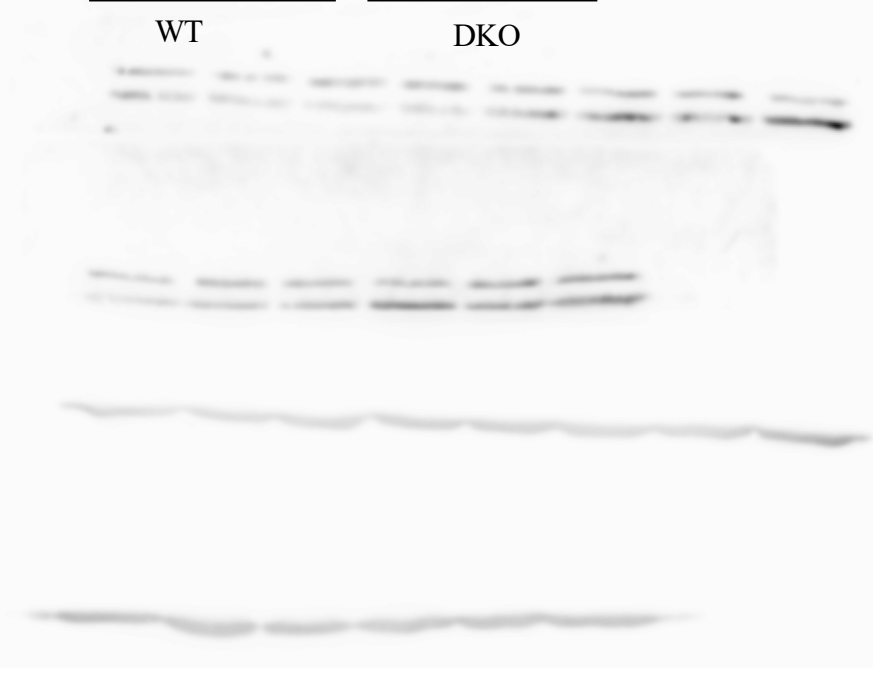

Figure 4B:  
 $\beta$ -Actin

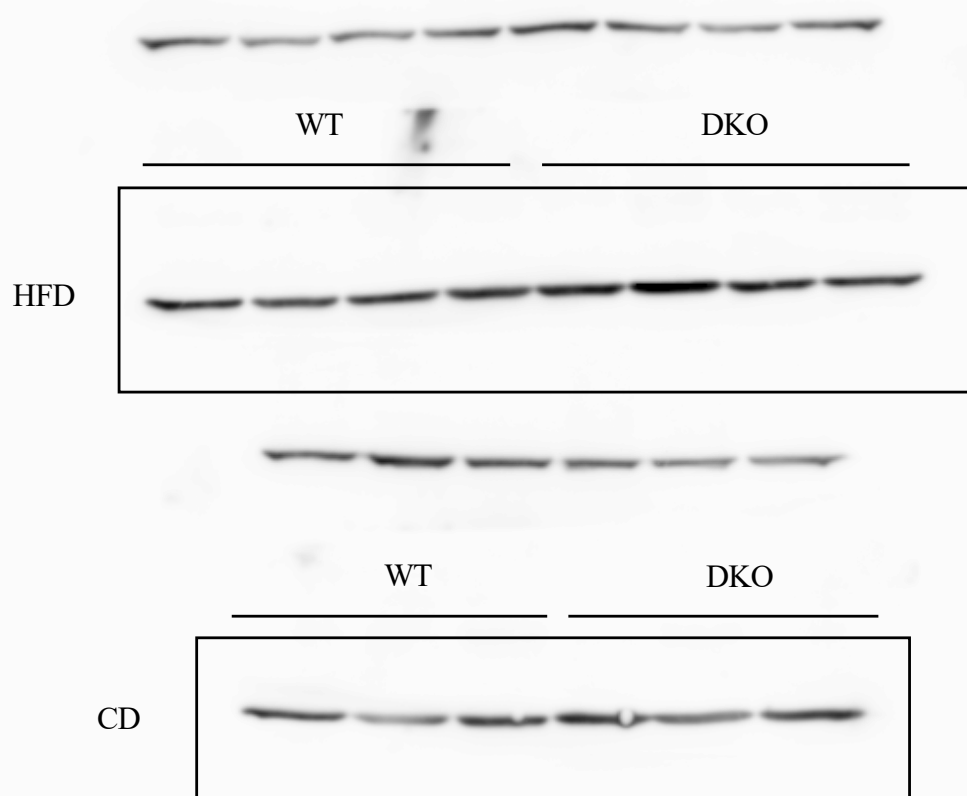

Figure 5A:  
IR

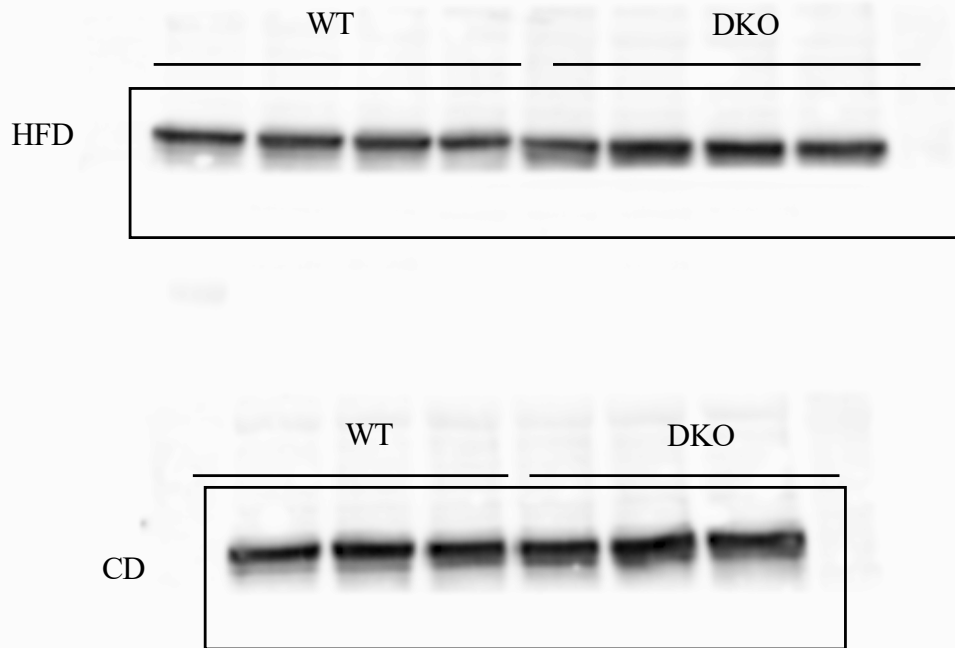

Figure 5A:  
IRS-1

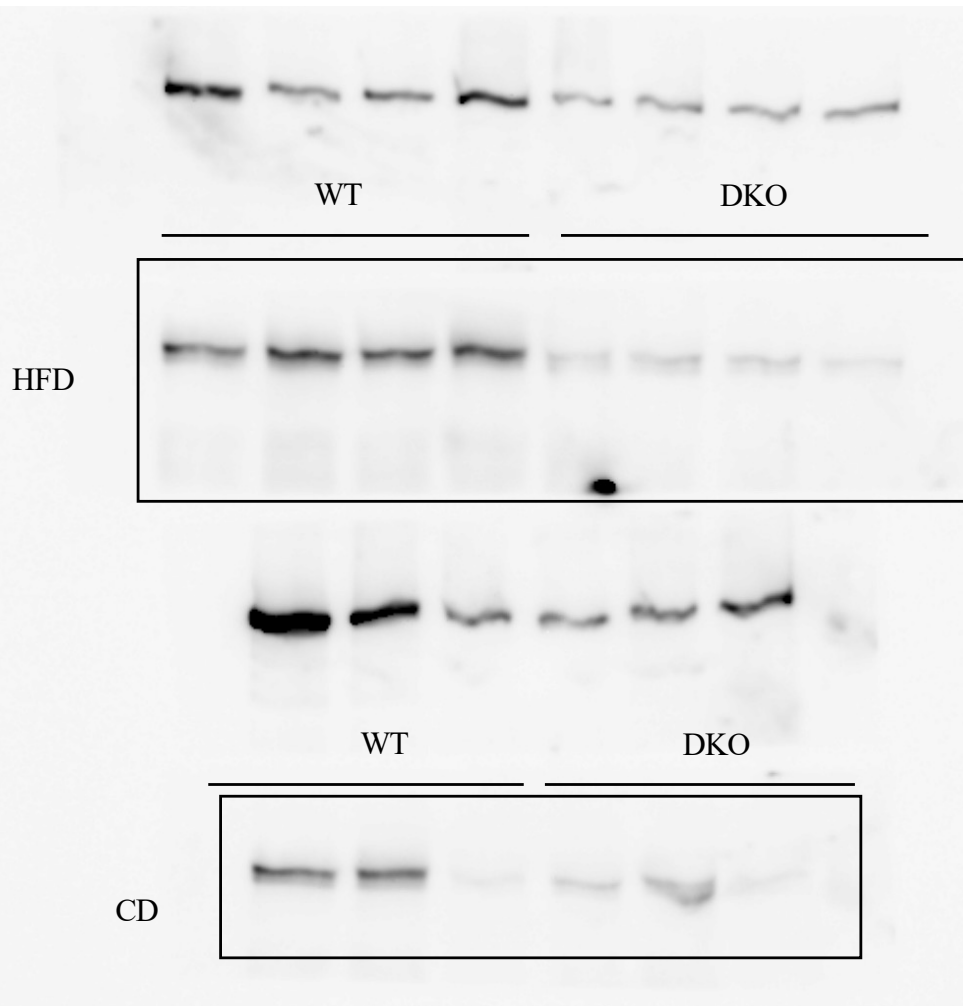

Figure 5A:  
P13-K

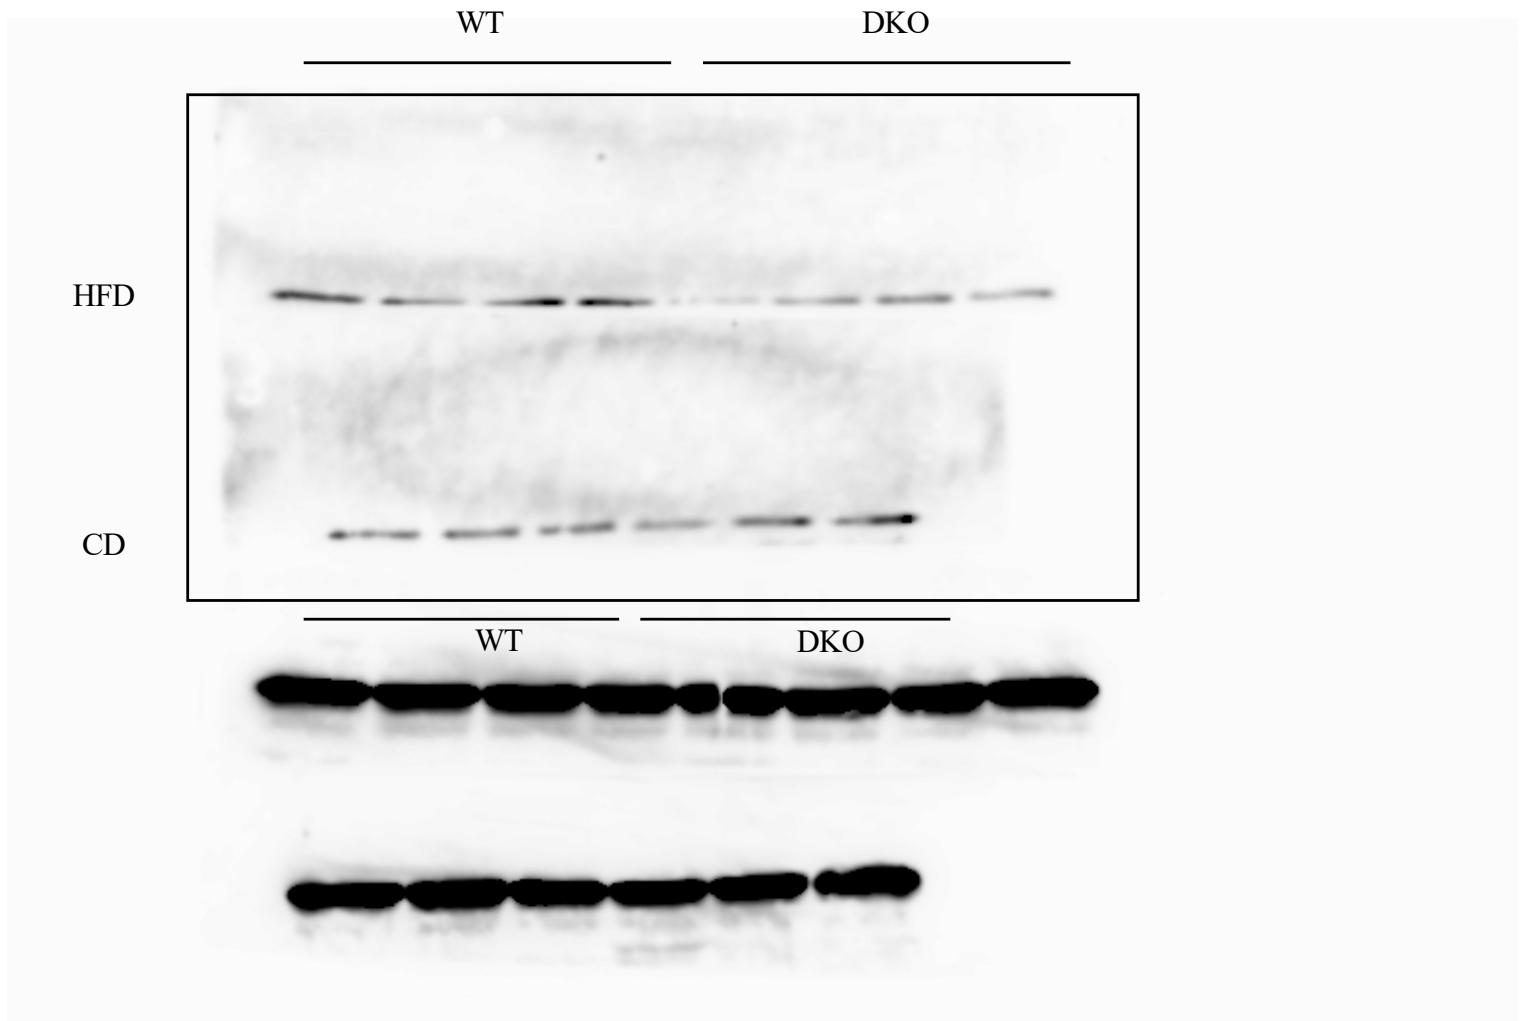



Figure 5A:  
Akt

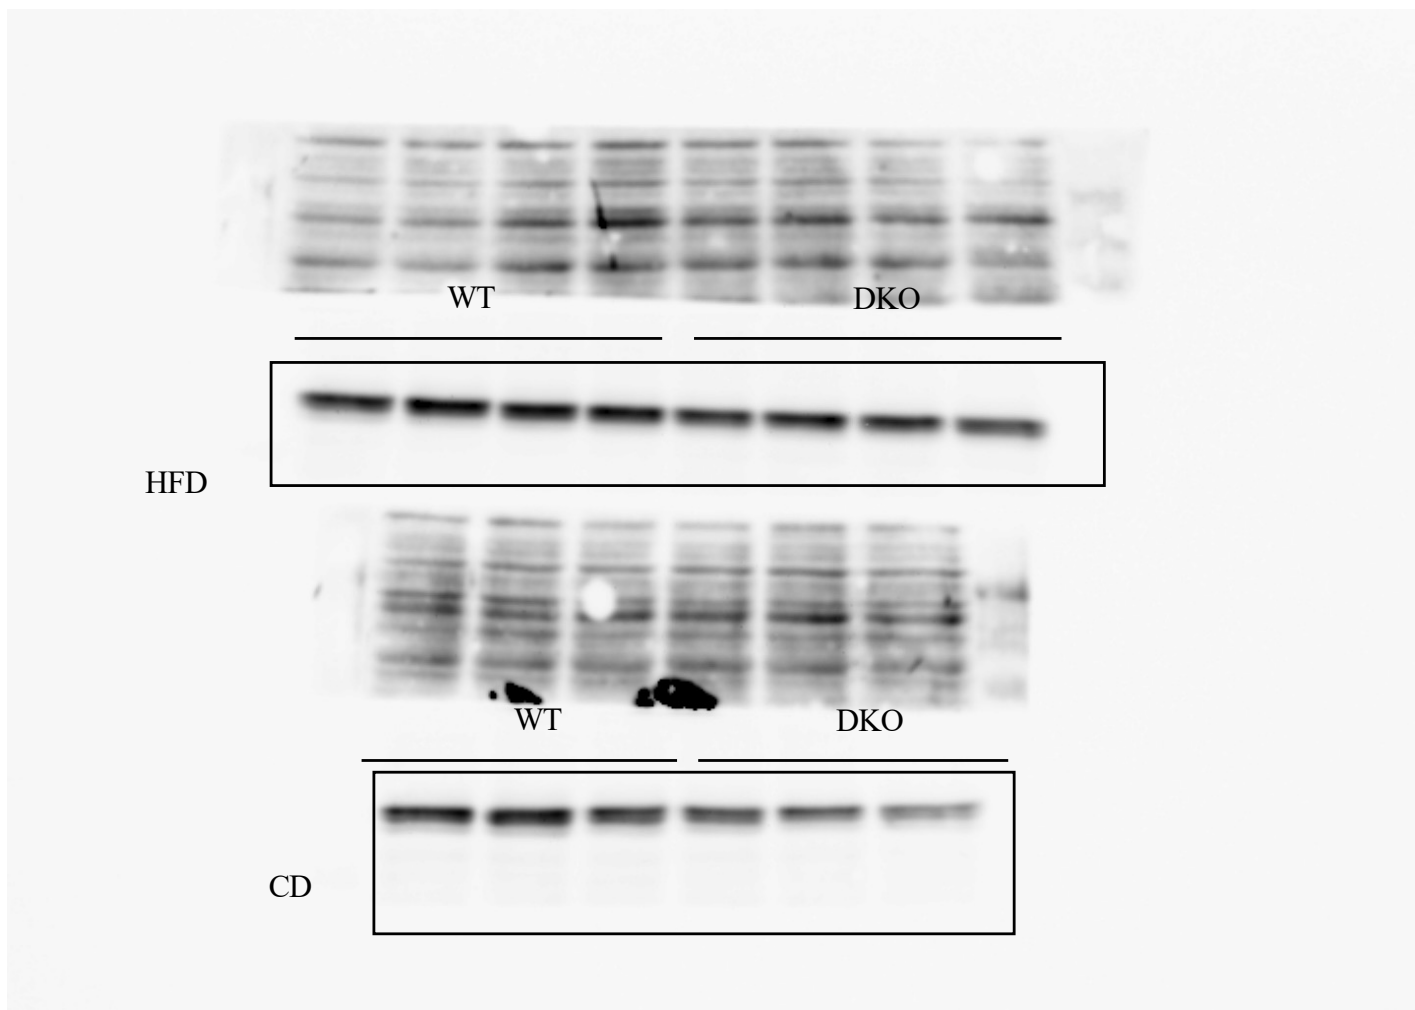

Figure 5A:  
SREBP-1c

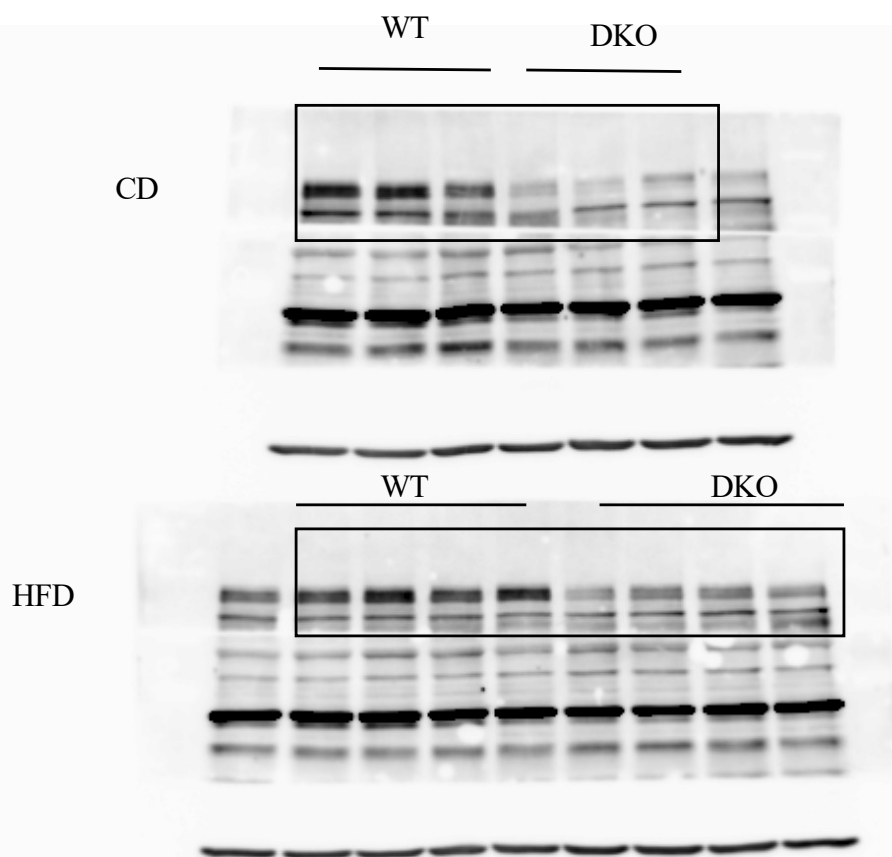

Figure 5A:  
 $\beta$ -Actin

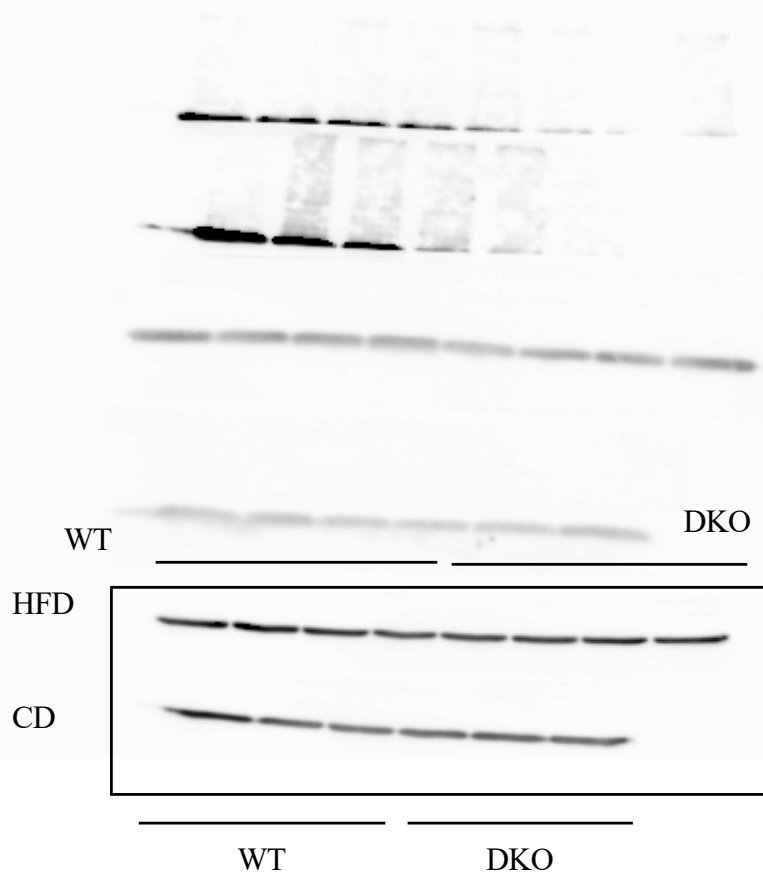

Figure 6A:  
p-Tyr

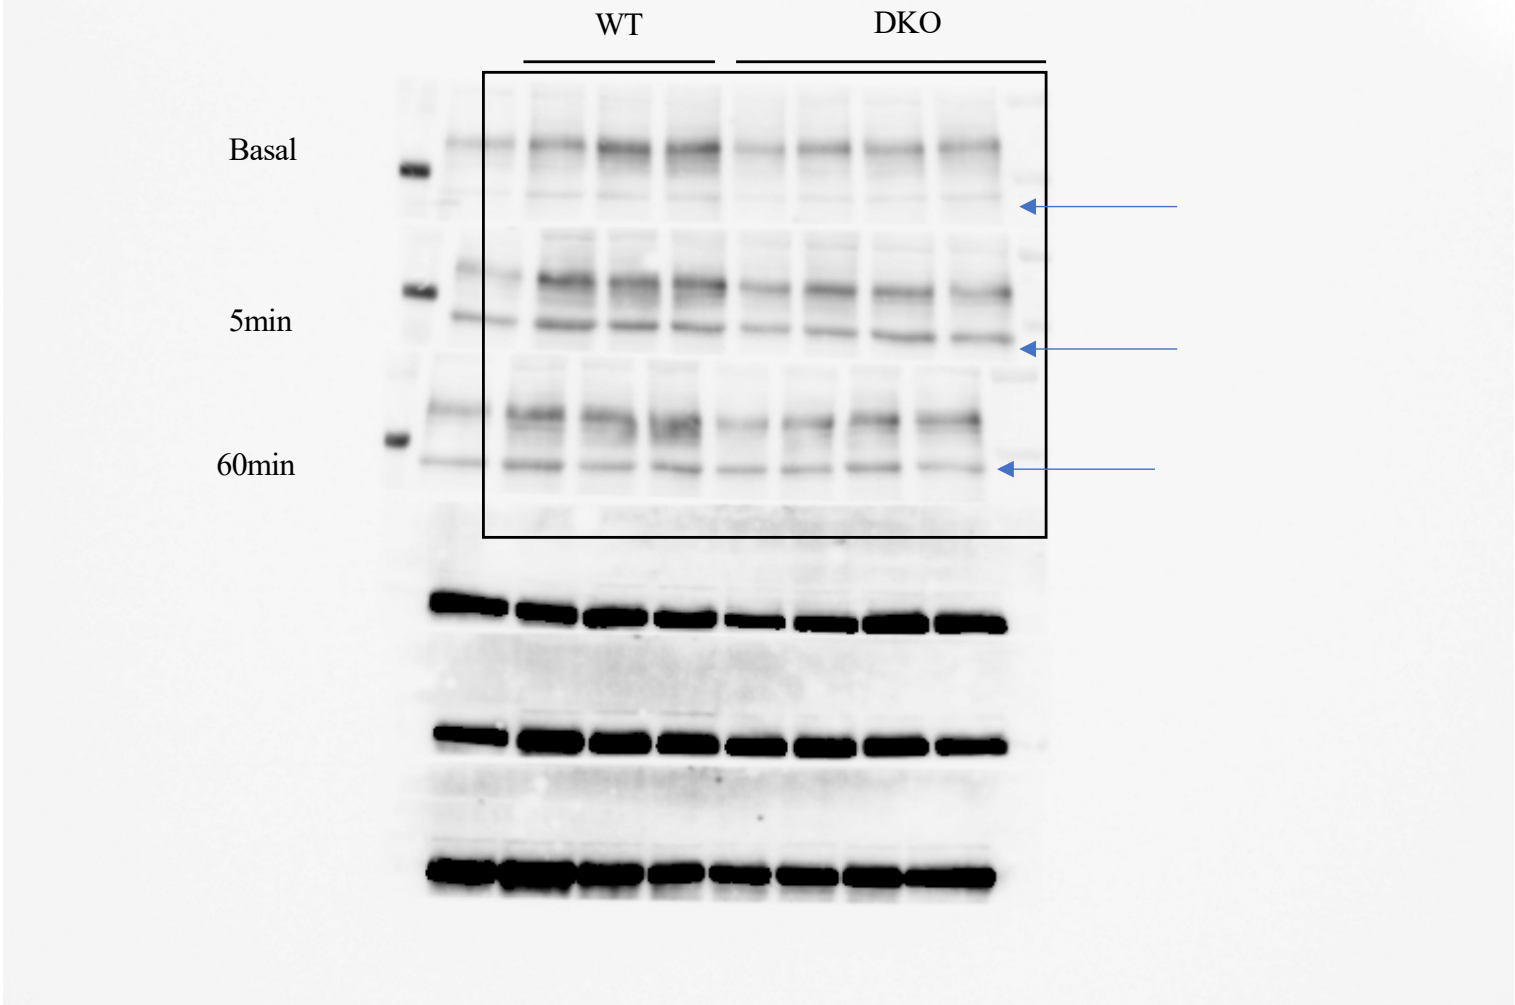

Figure 6A:  
IR

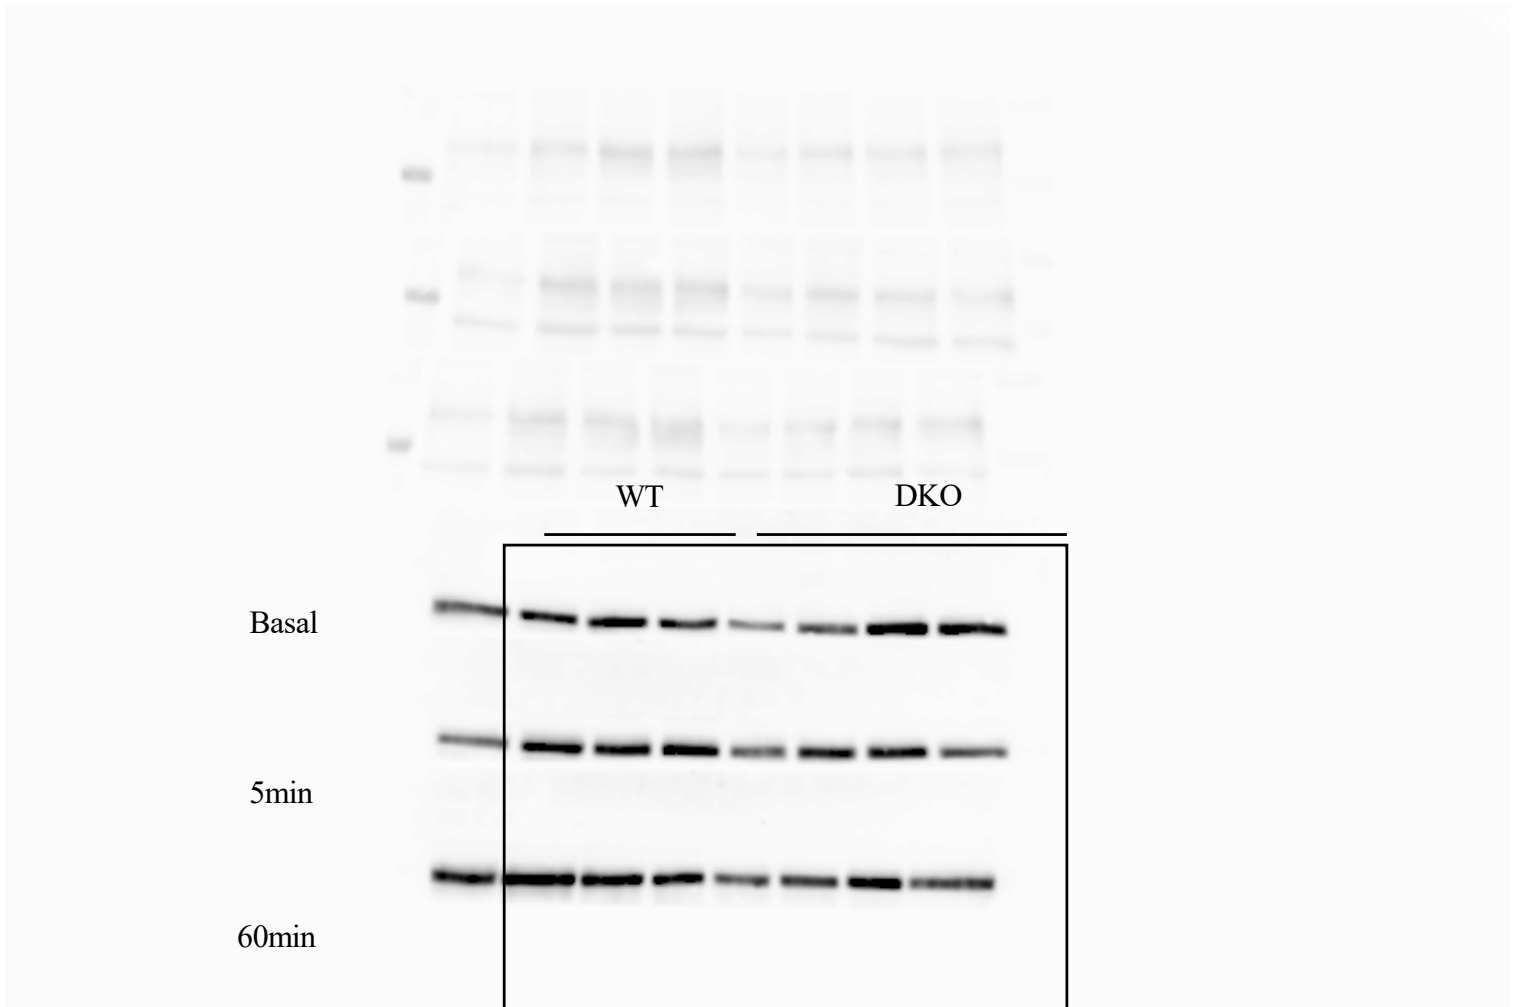

Figure 6A:  
pAkt

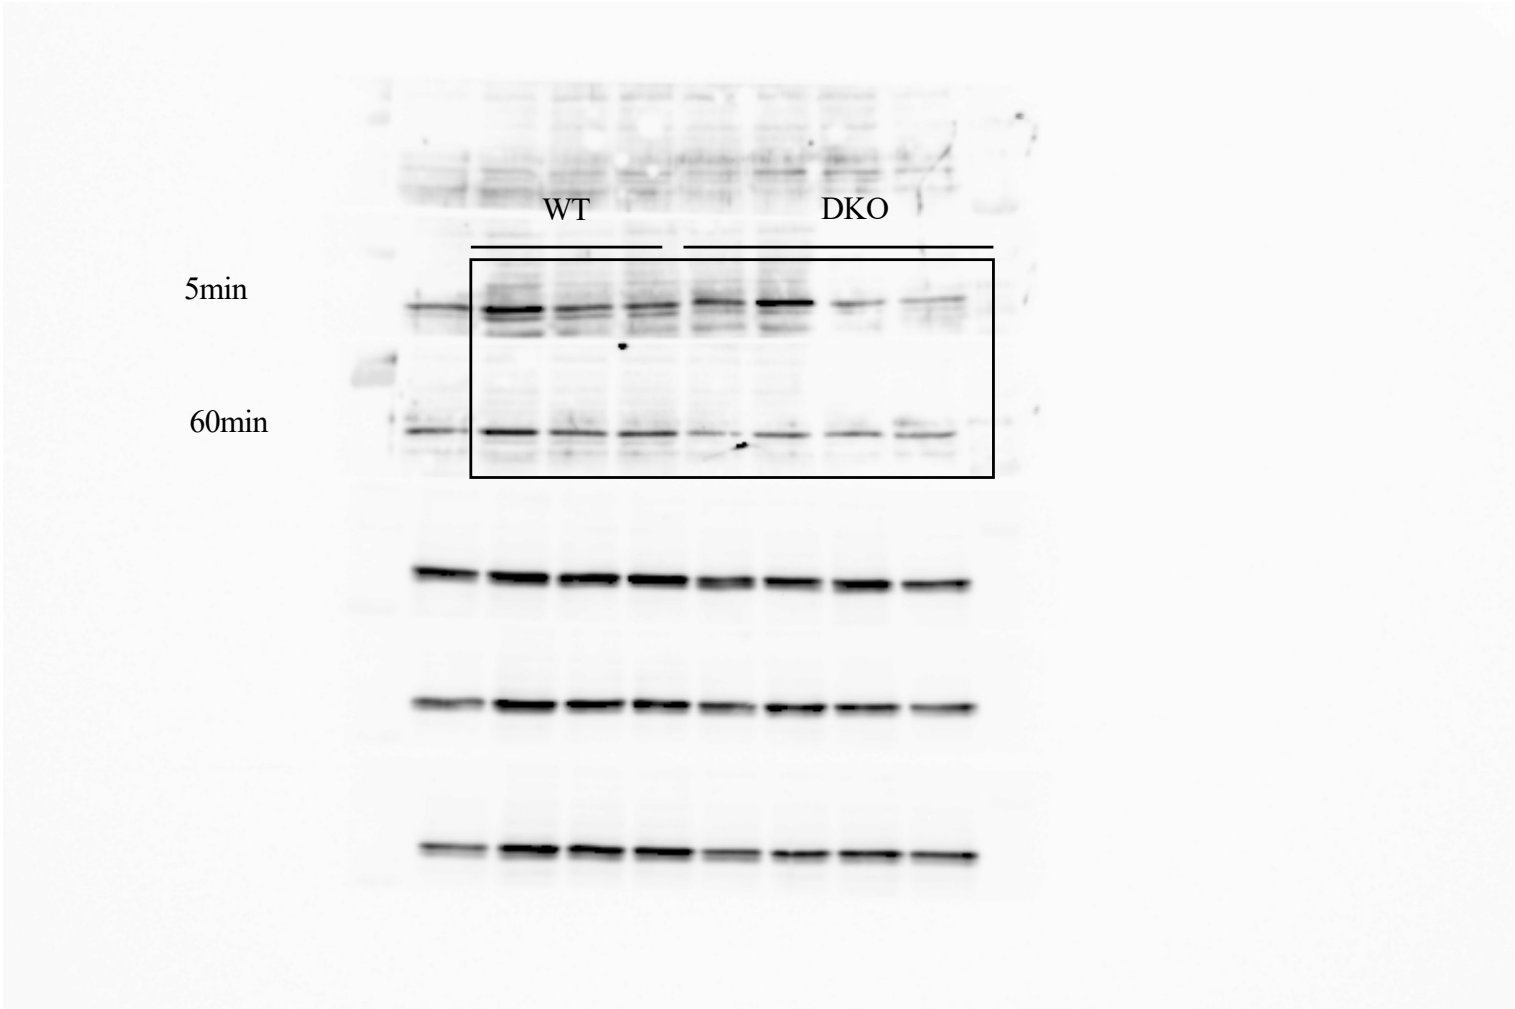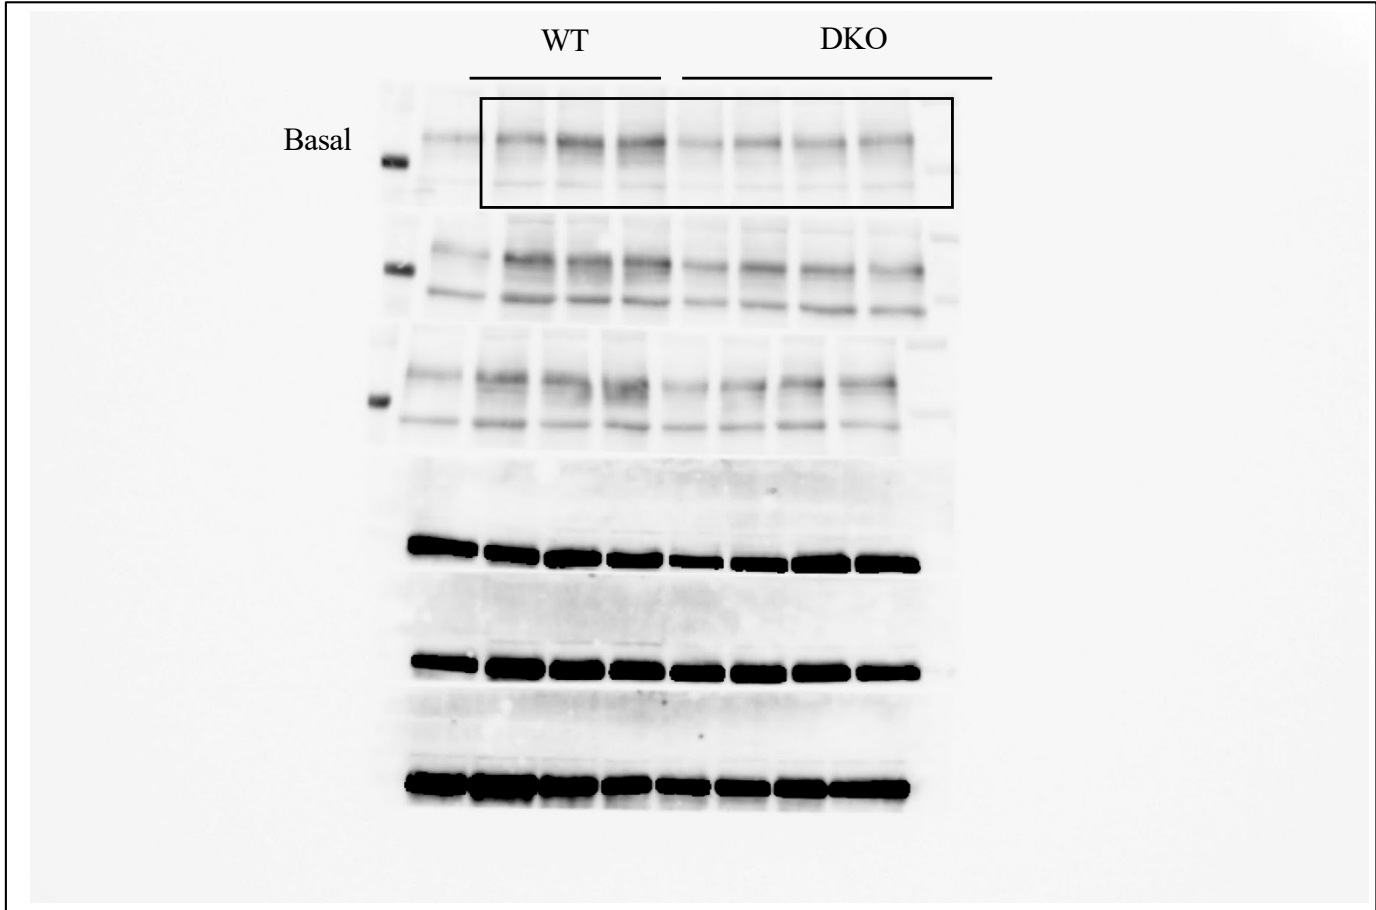

Figure 6A:  
Akt

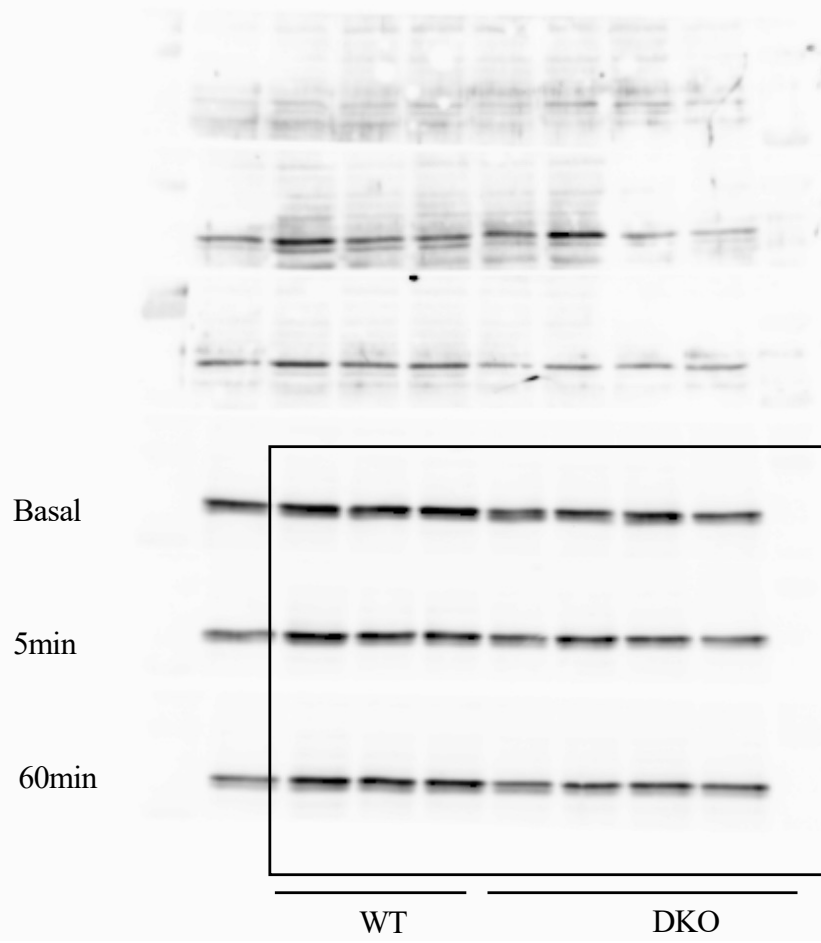

Figure 6A:  
pmTOR

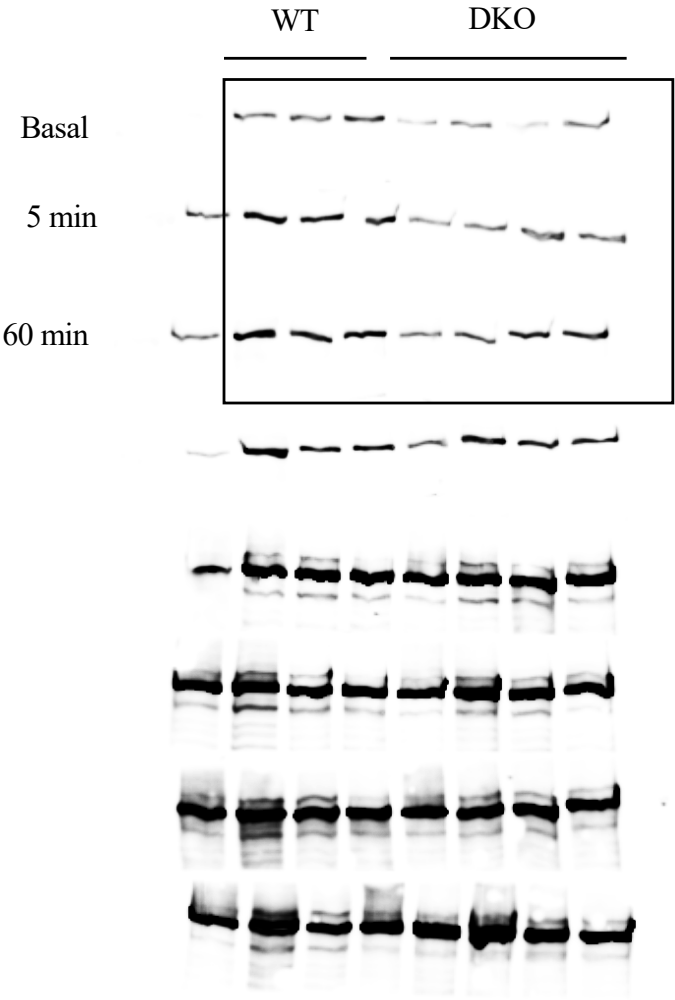



Figure 6A:  
mTOR

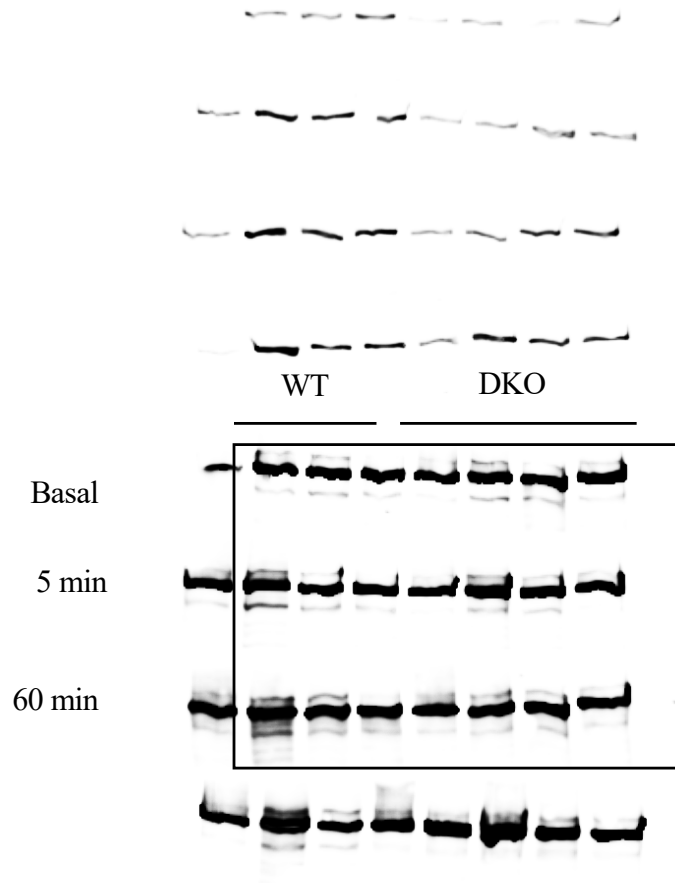

Figure 6A:  
N-SREBP-1c

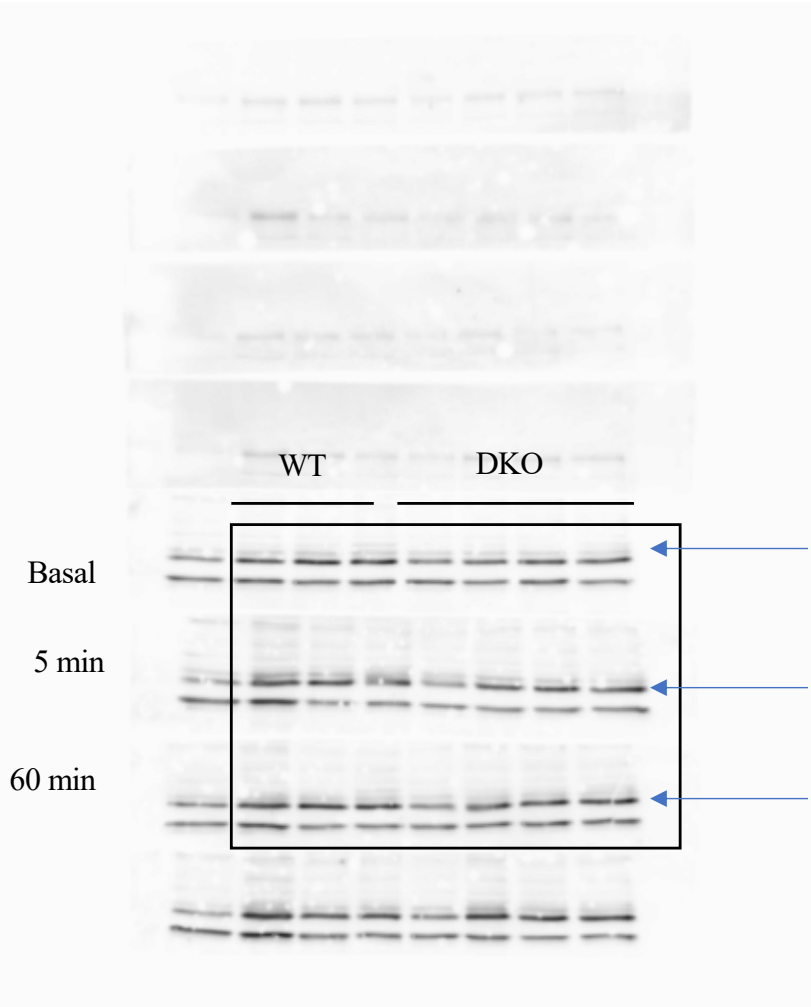

Figure 6A:  
T-SREBP-1c

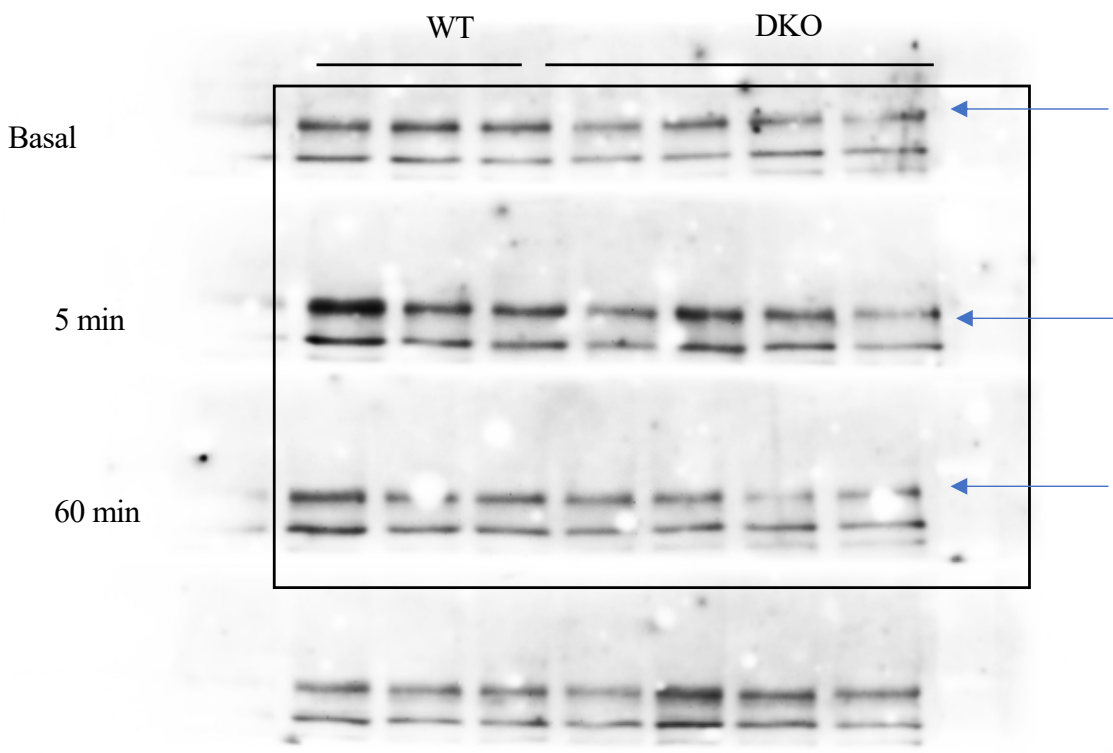

Figure 6A:  
pAMPK

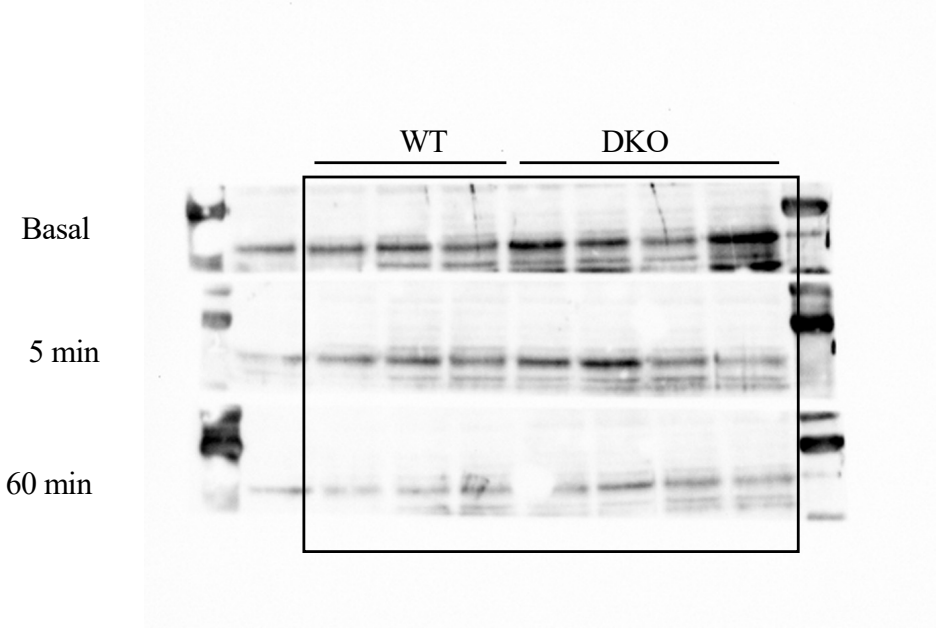

Figure 6A:  
AMPK

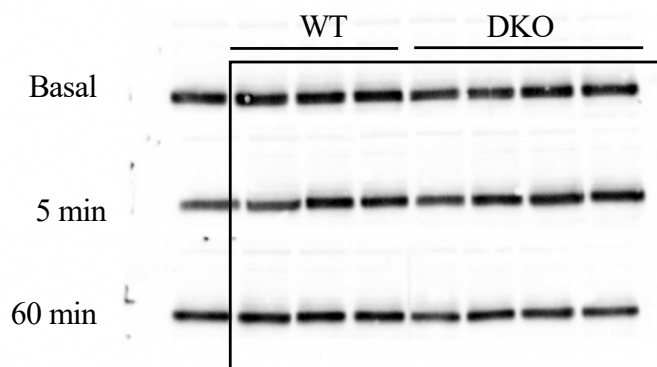

Figure 6A:  
 $\beta$ -Actin

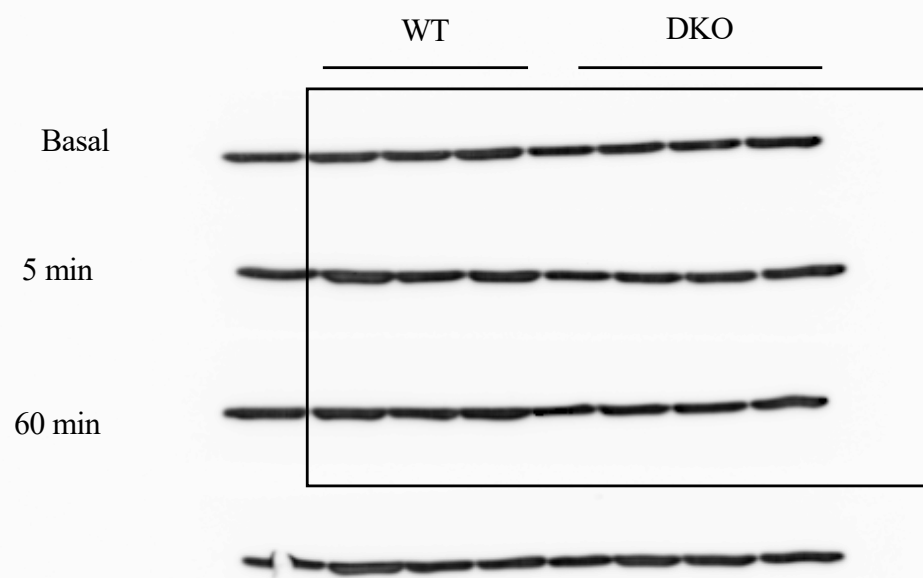

Figure 7A:  
FASN

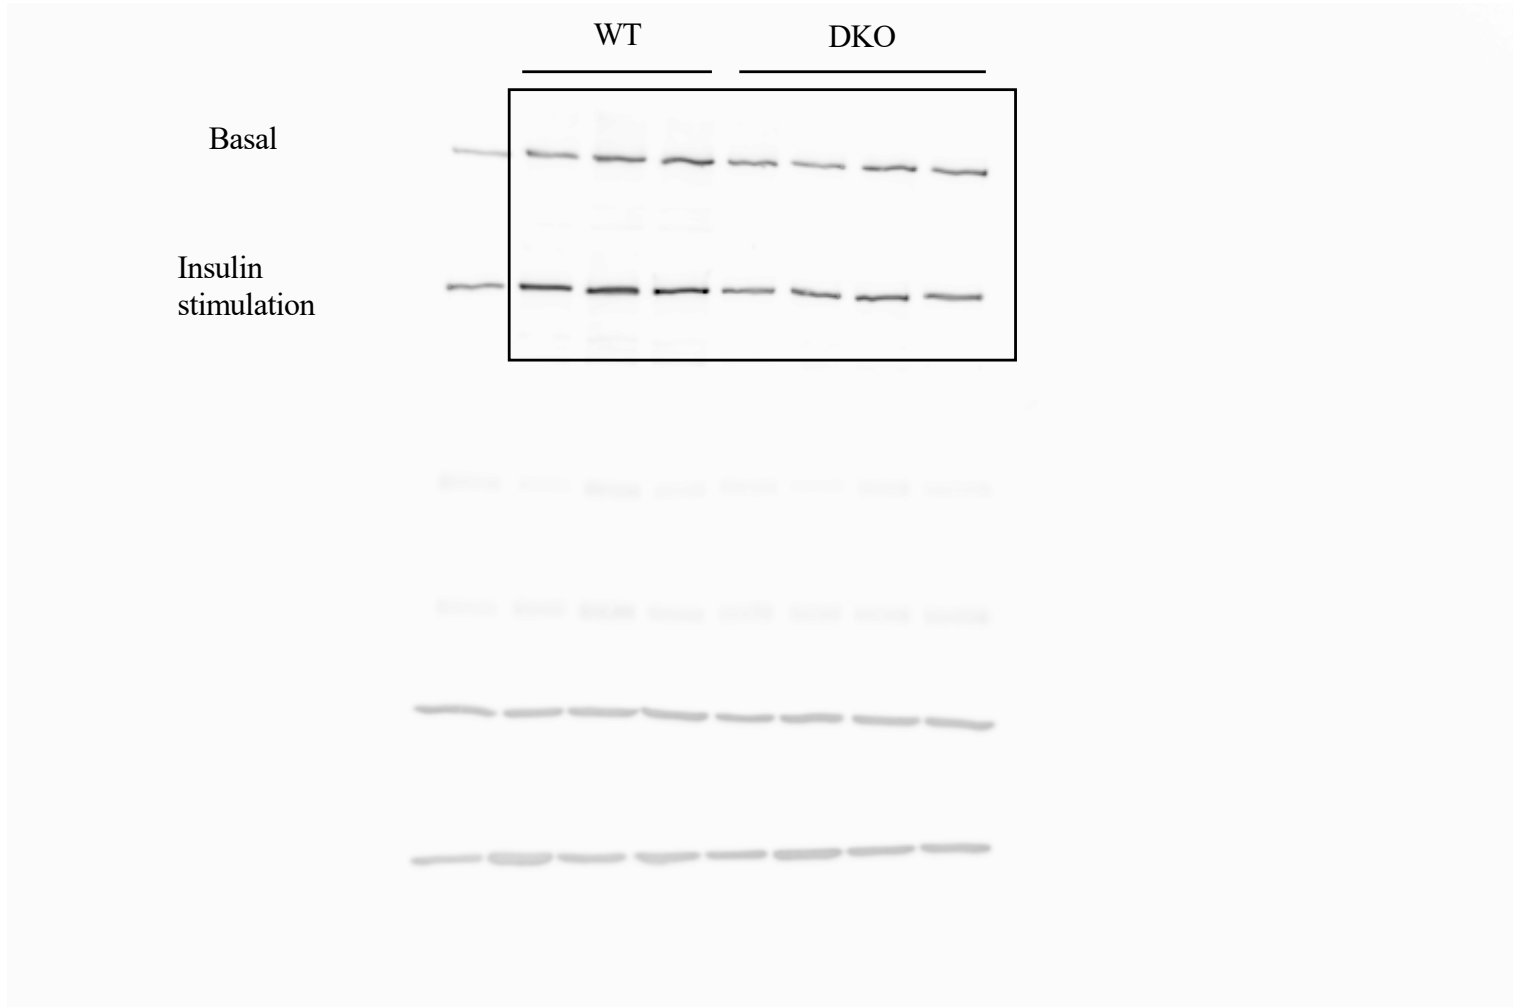

Figure 7A:  
ACC

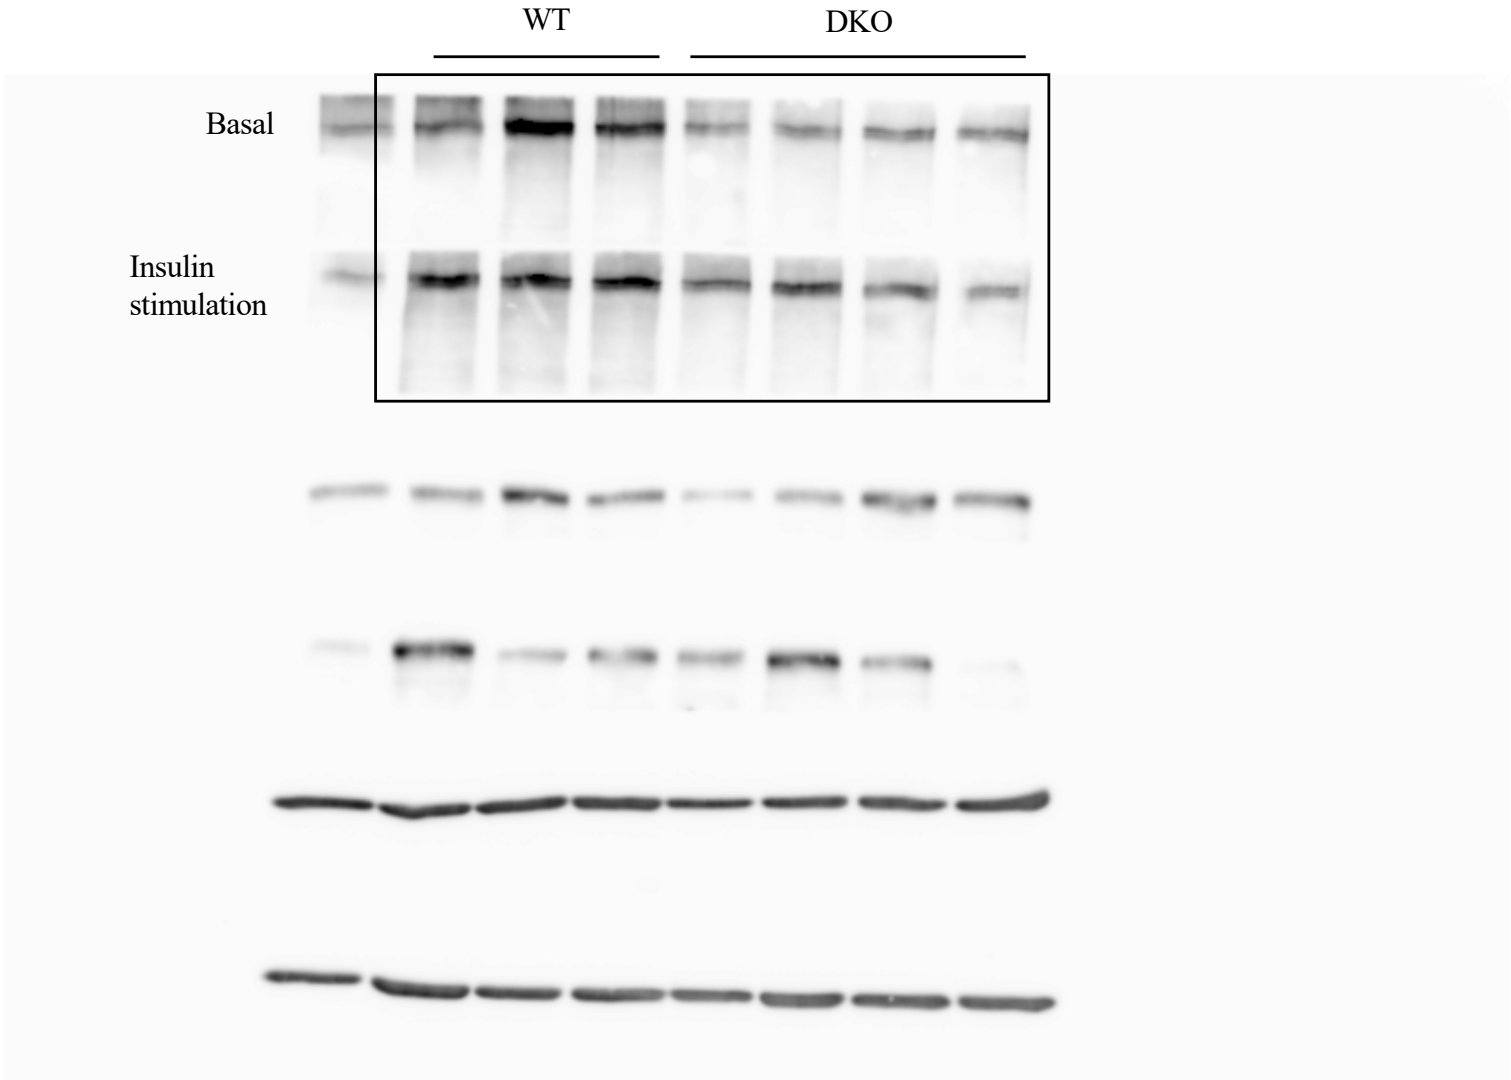



Figure 7A:  
FAT/CD36

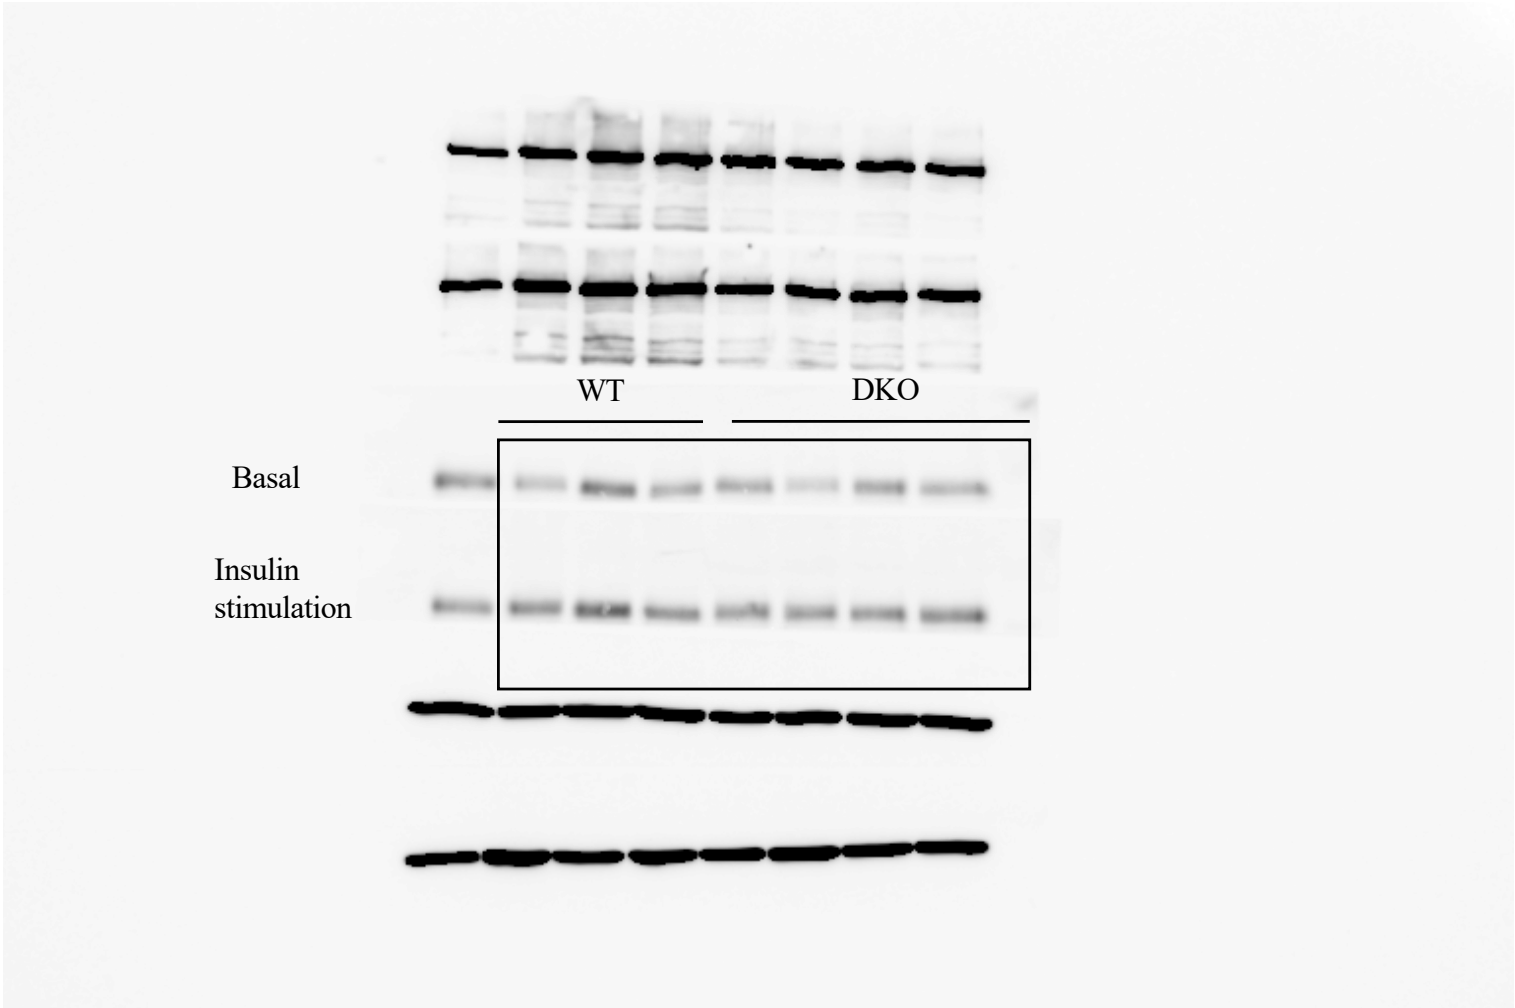

Figure 7A:  
 $\beta$ -Actin

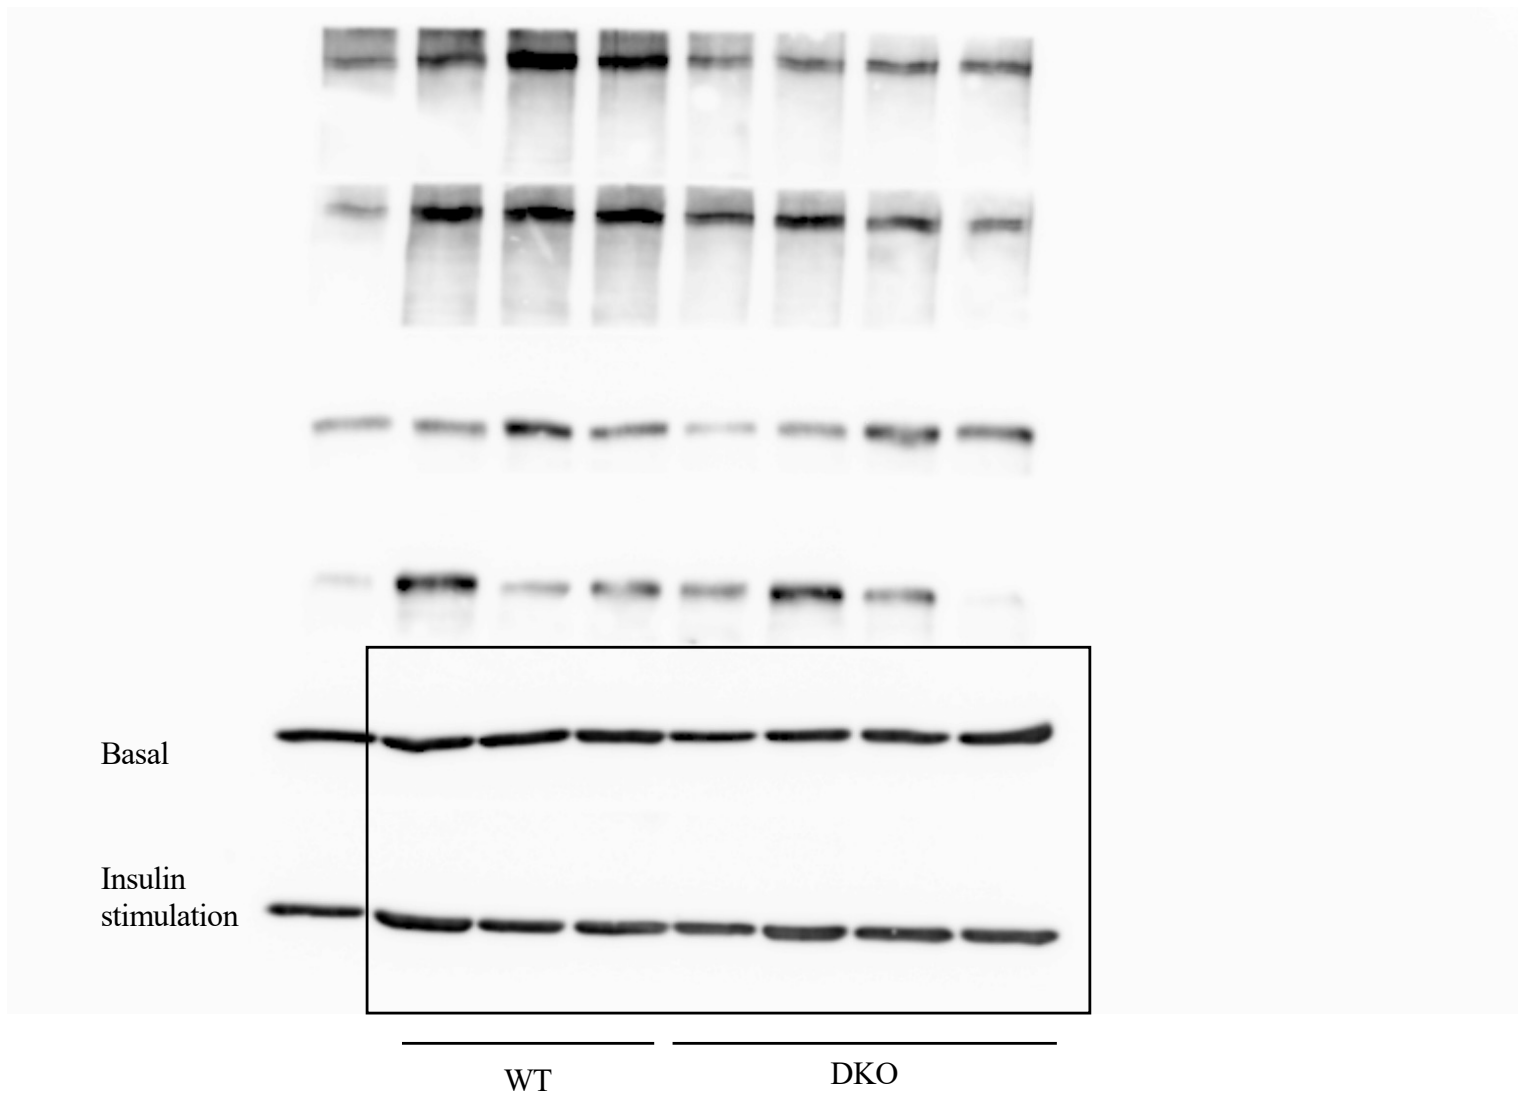

S4 Fig:  
p-Tyr

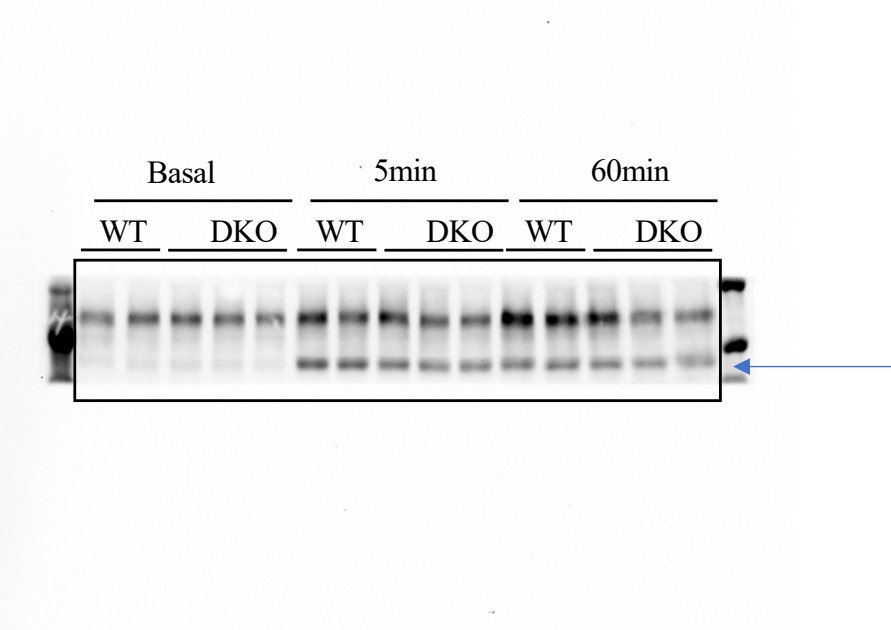

S4 Fig:  
IR

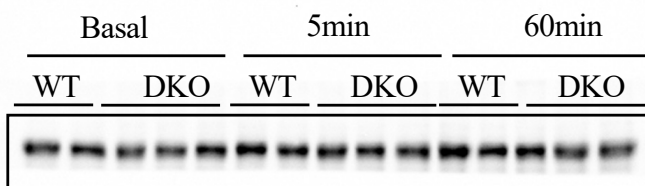

S4 Fig:  
pAkt

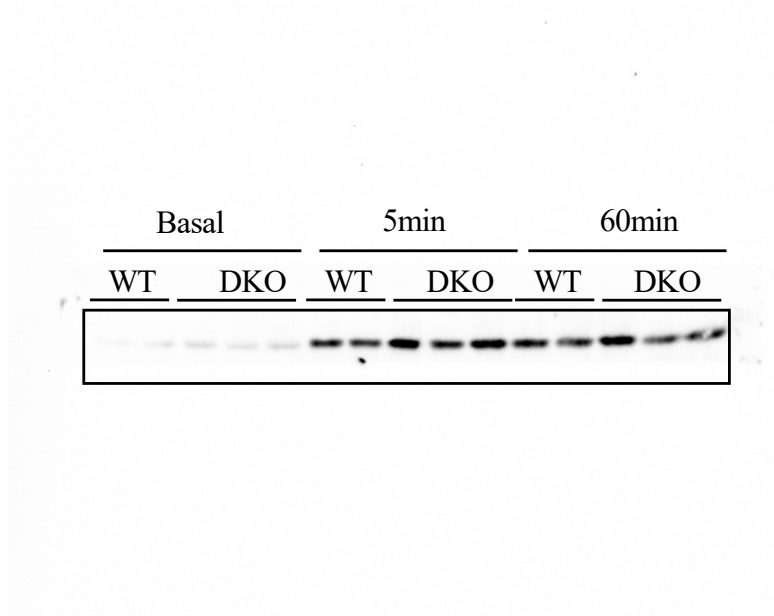

S4 Fig:  
Akt

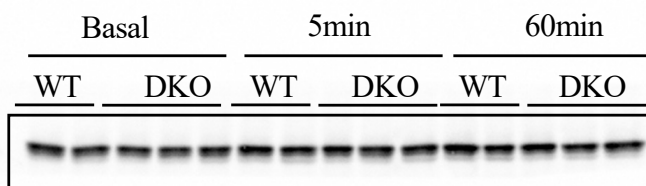

S4 Fig:  
pmTOR

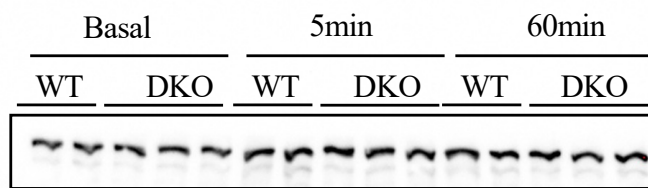

S4 Fig:  
mTOR

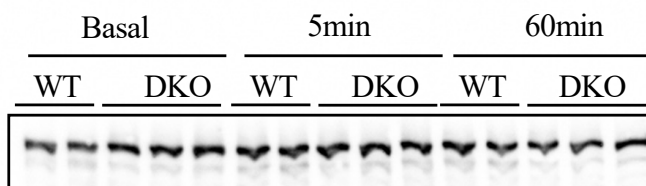



S4 Fig:  
pAMPK

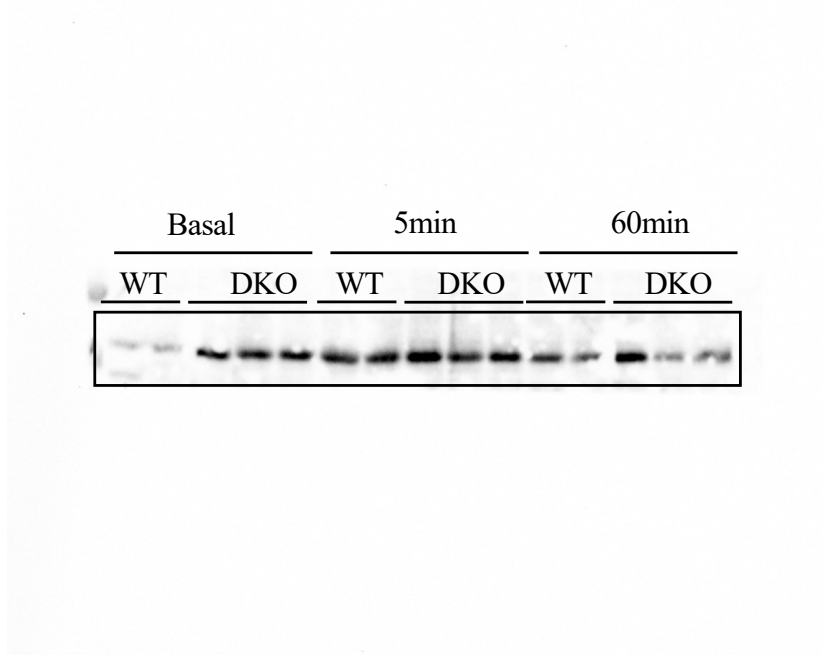

S4 Fig:  
AMPK

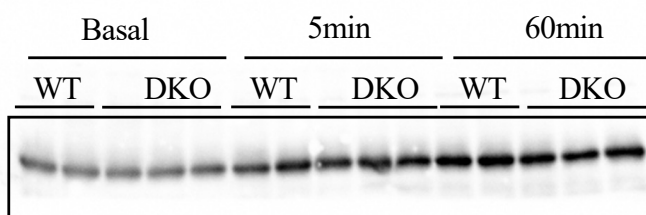

S4 Fig:  
 $\beta$ -Actin

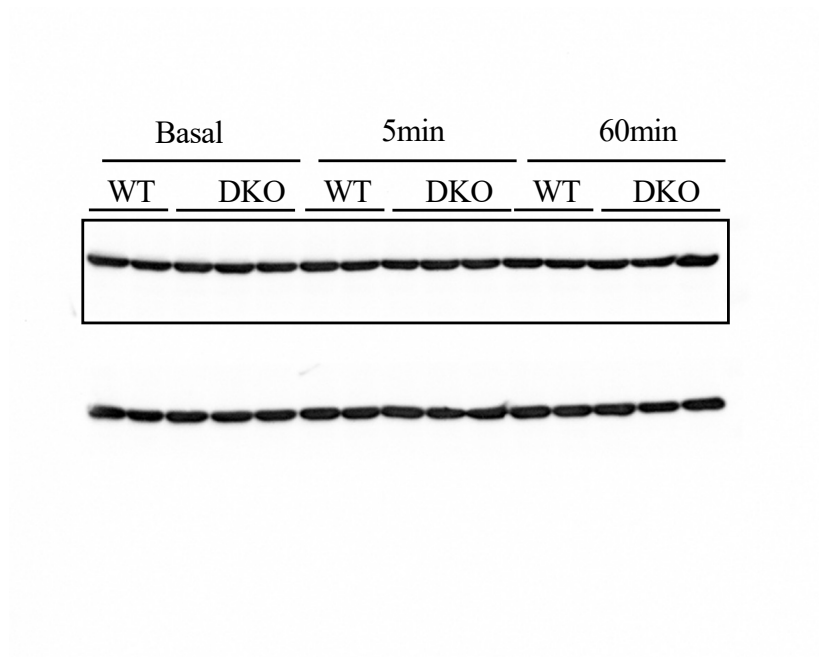

Supplement: pone.0281414.s006.pdf [file pone.0281414.s006.pdf]
